# Supplementary material for: A rapid, reliable, and automatable lab-on-a-chip interface
Source: Royal Society of Chemistry journal article supplement (doi:10.1039/b820183h), 2009-01-01
Supplement: b820183h.pdf [file b820183h.pdf]

## Supplemental Data

### A rapid, reliable, and automatable lab-on-a-chip interface

Hendrik Kortmann,<sup>a</sup> Lars Mathias Blank,<sup>\*ab</sup> and Andreas Schmid<sup>\*ab</sup>

Address: <sup>a</sup>ISAS-Institute for Analytical Sciences, Bunsen-Kirchhoff-Str. 11, D-44139 Dortmund, Germany, <sup>b</sup>Laboratory of Chemical Biotechnology, TU Dortmund, D-44221 Dortmund, Germany

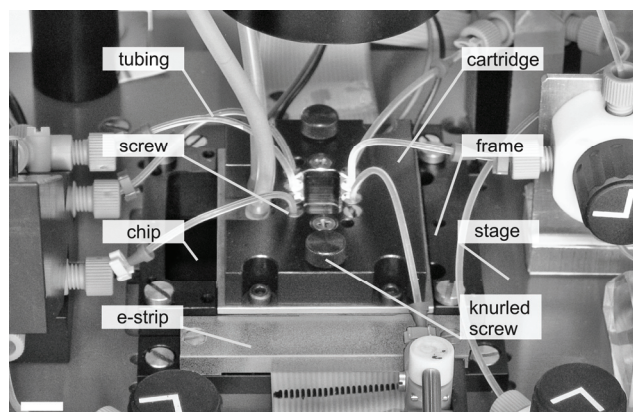

**Fig. S1** The glass chip connected via the new interface. The spring elements for the fluidic connections are mounted in the cartridge. Their positions are indicated by the screws and the tubings. The cartridge is fixed by two knurled screws on the frame by which the chip is positioned. The chip electrics are connected by the e-strip. The assembly is installed on a stage mounted on the microscope stage. White scale bar is 10 mm.
